# Supplementary material
Source: Springer Nature journal article supplement (https://www.springermedizin.de/resource/supplementary/12885_2007_1058_MOESM1_ESM.pdf/9471000)

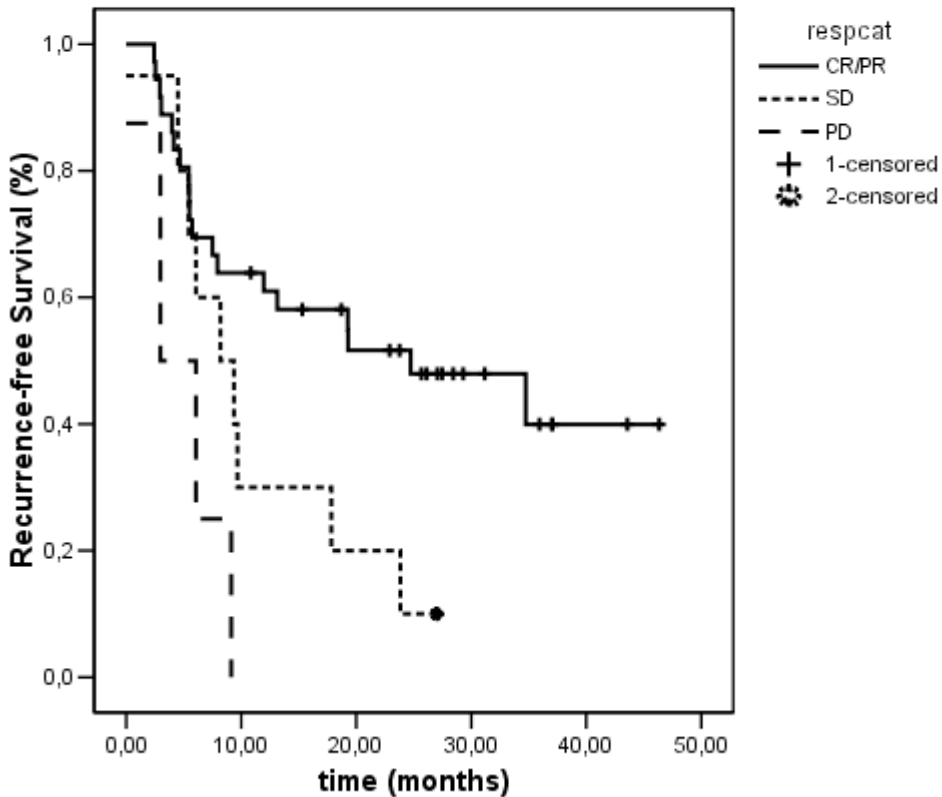

Supplement: MOESM1 [file 9471000]
